# Supplementary material for: In Vitro Characterization of Motor Neurons and Purkinje Cells Differentiated from Induced Pluripotent Stem Cells Generated from Patients with Autosomal Recessive Spastic Ataxia of Charlevoix-Saguenay
Source: Hindawi journal article supplement (doi:10.1155/2023/1496597), 2023-04-15

## Supplementary materials

---

### In vitro characterization of motor neurons and Purkinje cells differentiated from induced pluripotent stem cells generated from patients with autosomal recessive spastic ataxia of Charlevoix-Saguenay

Aurélie Louit<sup>1‡</sup>, Marie-Josée Beaudet<sup>1‡</sup>, Mathieu Blais<sup>1</sup>, François Gros-Louis<sup>1,2</sup>, Nicolas Dupré<sup>1,3</sup>, François Berthod<sup>1,2\*</sup>

<sup>1</sup>LOEX, Centre de recherche du CHU de Québec-Université Laval, Quebec City, Quebec, Canada

<sup>2</sup>Department of Surgery, Faculty of Medicine, Université Laval, Quebec City, Quebec, Canada

<sup>3</sup>Department of Medicine, Faculty of Medicine, Université Laval, Quebec City, Quebec, Canada

| ARSACS Cell line    | FARSF56-7                | FARSM50-5                | SK.01AiPS                |
|---------------------|--------------------------|--------------------------|--------------------------|
| <b>Abbreviation</b> | A1                       | A2                       | A3                       |
| <b>Sex</b>          | Female                   | Male                     | Female                   |
| <b>Age</b>          | 56                       | 50                       | 35                       |
| <b>Genotype</b>     | Homozygous<br>c.8844delT | Homozygous<br>c.8844delT | Homozygous<br>c.9284dupC |

**Supplementary Table 1:** Indications of the sex, age and genotype of the parental cell lines used from ARSACS patients.

Supplementary figure S1: Original Western blots used in figure 4.

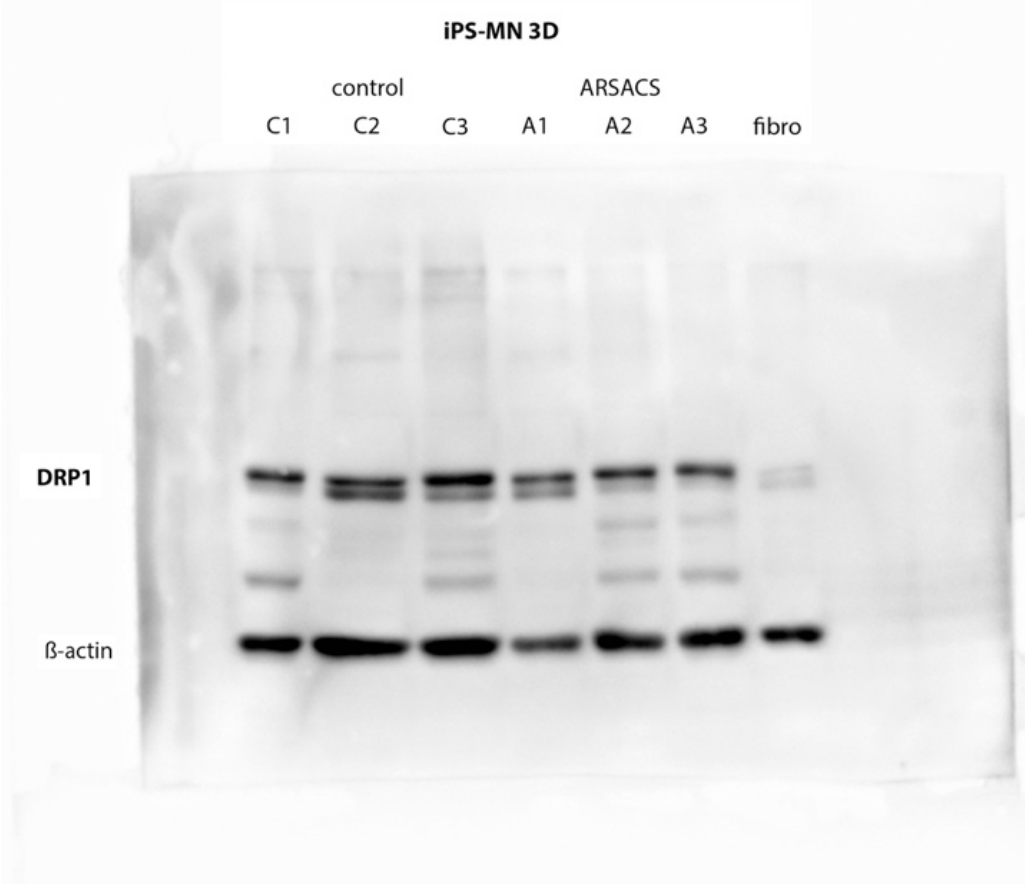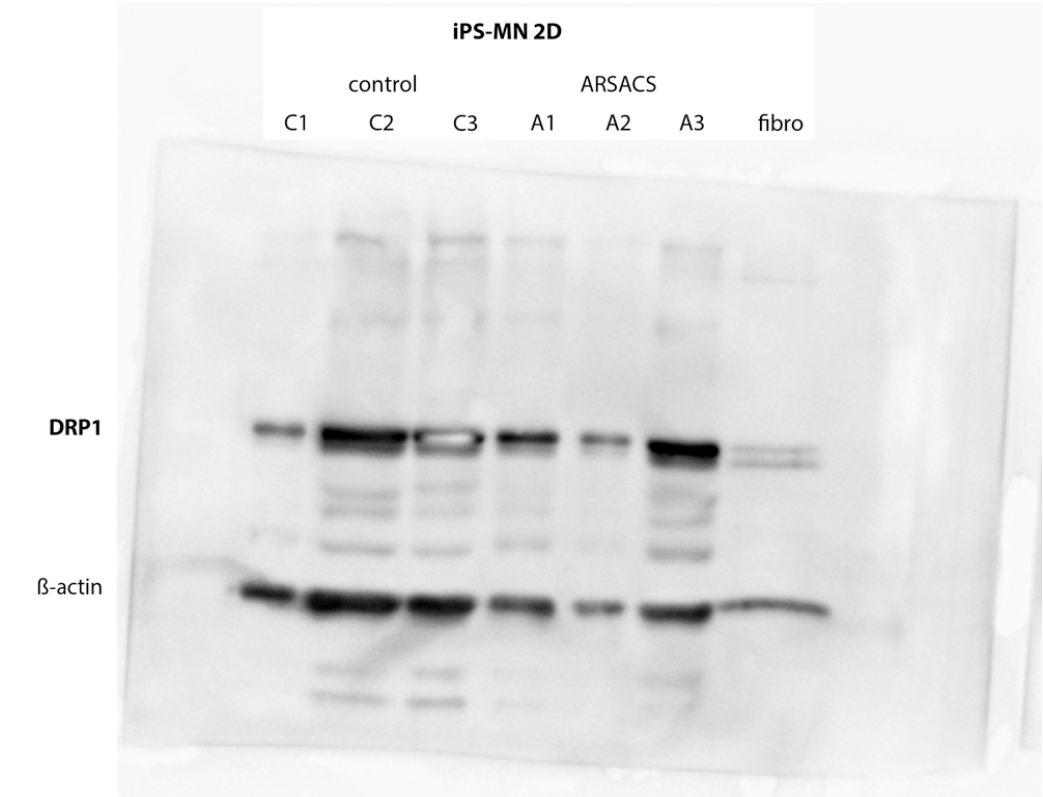

**iPS-MN 3D**

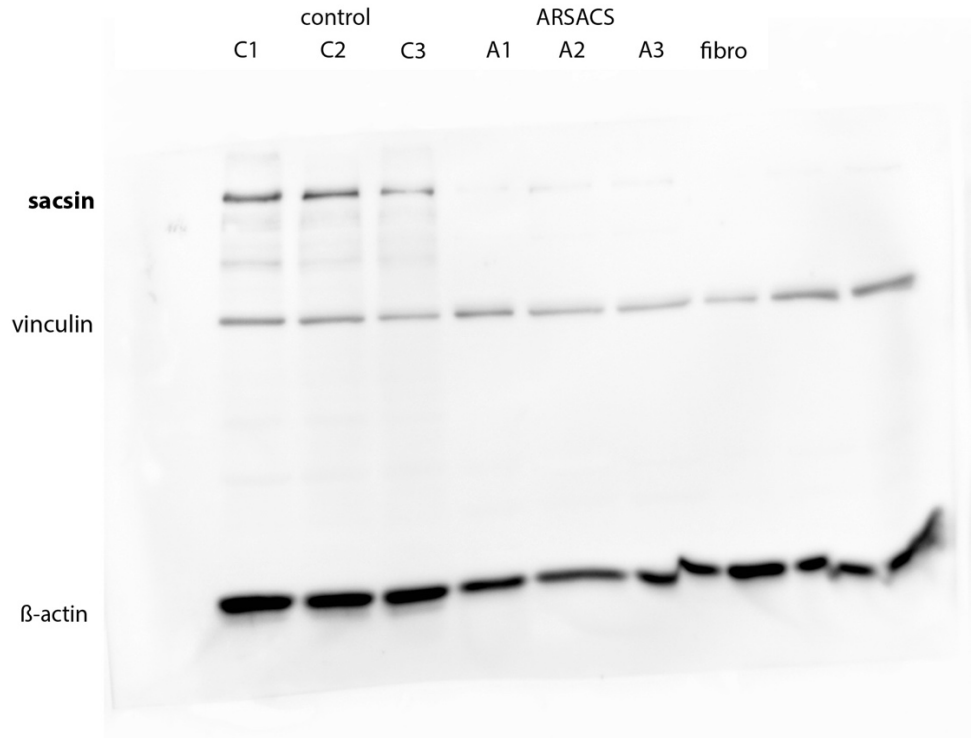

**iPS-MN 2D**

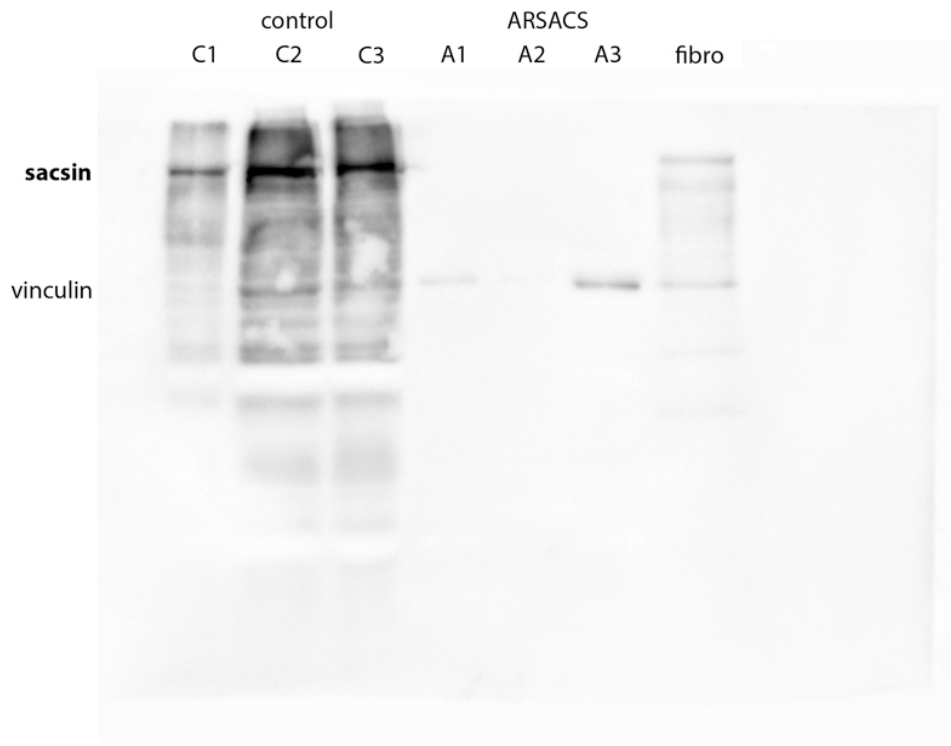

### iPS-Purkinje 2D

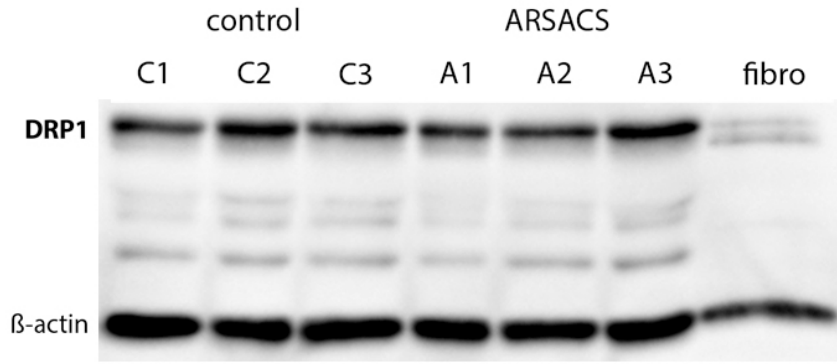

### iPS-Purkinje 3D

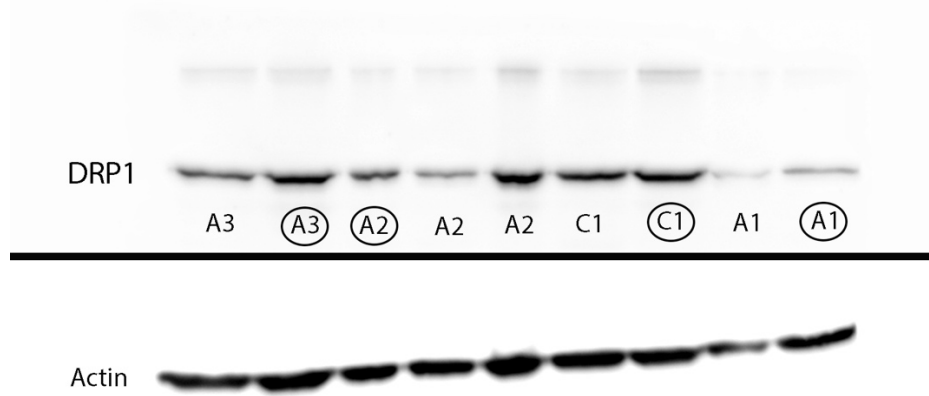

iPS-Purkinje 3D

(C1) C1 C1 A1 (A1) A1

sacsin

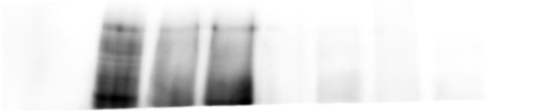

vinculin

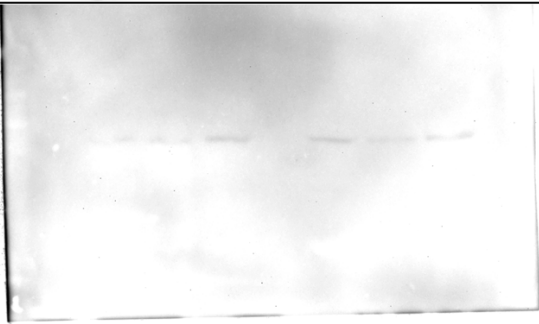

A3 A3 (A3) A2 A2 (A2)

sacsin

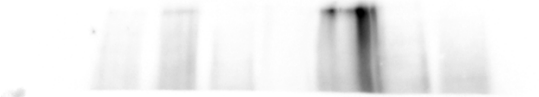

vinculin

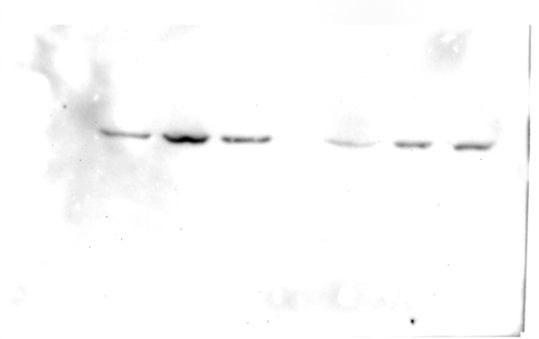

iPS-Purkinje 2D

control ARSACS  
C1 C2 C3 A1 A2 A3 fibro

sacsin

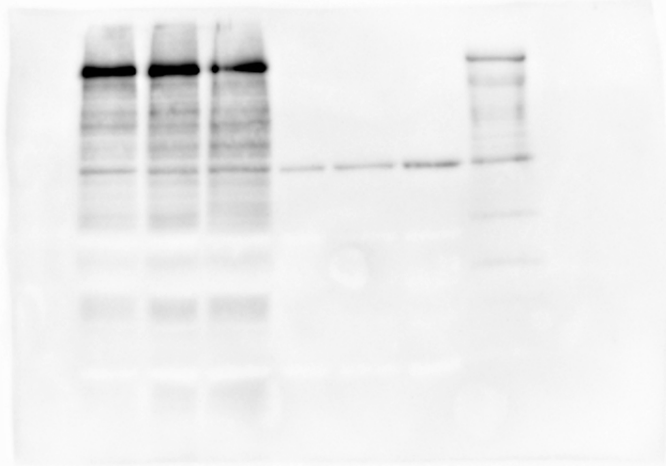

vinculin



Supplement: f1 [file 1496597.f1.pdf]
